# Supplementary material for: An ordered array based on vapor-processed phthalocyanine nanoribbons
Source: Royal Society of Chemistry journal article supplement (doi:10.1039/c4tc00123k), 2014-01-01
Supplement: c4tc00123k1.pdf [file c4tc00123k1.pdf]

## Ordered Array based on Vapor-Processed Phthalocyanine Nanoribbons

Qiubing Min<sup>a</sup>, Xiaoli Zhao<sup>a</sup>, Bin Cai<sup>a</sup>, Yan Liu<sup>a</sup>, Qingxin Tang<sup>\*a</sup>, Yanhong Tong<sup>\*a</sup>,  
Wenping Hu<sup>\*b</sup>, Yichun Liu<sup>a</sup>

<sup>a</sup> Key Laboratory of UV Light Emitting Materials and Technology under Ministry of Education, Northeast Normal University, Changchun 130024, P. R. China

<sup>b</sup> Beijing National Laboratory for Molecular Sciences Key Laboratory of Organic Solids, Institute of Chemistry Chinese Academy of Sciences, Beijing 100080, P. R. China

\*Corresponding author E-mail: (Q. X. Tang) E-mail: [tangqx@nenu.edu.cn](mailto:tangqx@nenu.edu.cn);  
(Y. H. Tong) [tongyh@nenu.edu.cn](mailto:tongyh@nenu.edu.cn); (W. P. Hu) E-mail: [huwp@iccas.ac.cn](mailto:huwp@iccas.ac.cn)

### Supplementary Information:

#### An optical microscopy image of the electrodes

The electrical measurement of the single nanoribbon device was realized by scratching the electrodes into the small area around the nanoribbon. The channel length and the channel width can be measured by SEM and optical microscopy. The channel length is in the range of 7.9-23.6  $\mu\text{m}$ , and the channel width is the width of the nanoribbon (126-1700 nm).

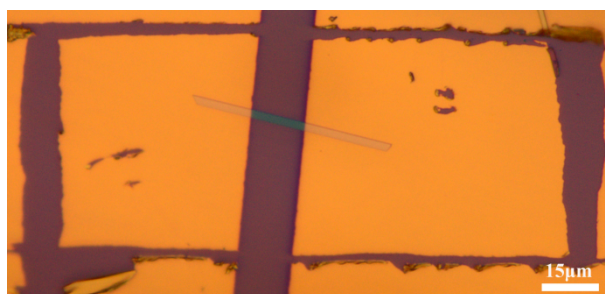

An optical microscopy images of the electrodes
